# Supplementary material for: Soil Fungal Community Composition Correlates with Site-Specific Abiotic Factors, Tree Community Structure, and Forest Age in Regenerating Tropical Rainforests
Source: MDPI journal article supplement (doi:10.3390/biology10111120), 2021-10-31
Supplement: s1 [file s1]

# Richness and Composition of Soil Fungal Communities Correlate with Site-Specific Abiotic Factors, Tree Community Composition, and Forest Age in Regenerating Tropical Rainforests

Irene Adamo <sup>1,2,3</sup>, Edgar Ortiz-Malavasi <sup>4</sup>, Robin Chazdon <sup>5</sup>, Priscila Chaverri <sup>6,7</sup>, Hans ter Steege <sup>1</sup>, József Geml <sup>1,2,8\*</sup>

## Supporting Information

**Figure S1.** (a) Mean Diurnal Range, Mean Annual Precipitation and Precipitation Seasonality in the two different regions. (b) Organic matter, estimated nitrogen release, pH and soil chemical elements for primary and secondary forest (SF) in the two regions, Piro and Mogos. The letters denote the significance difference (Tukey HSD test).

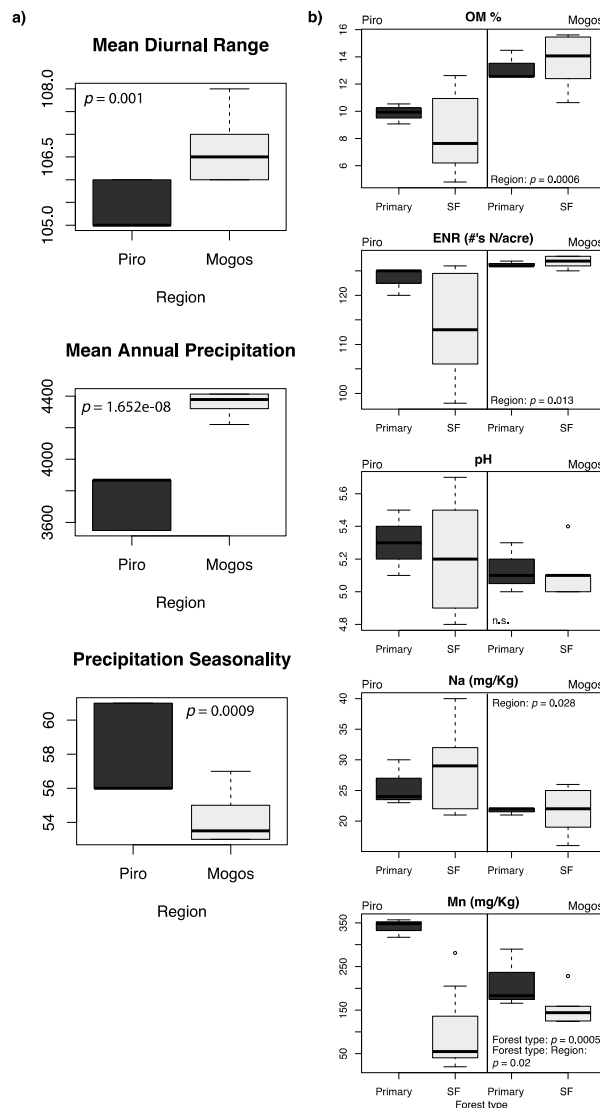

**Figure S2.** Global nonmetric multidimensional scaling (GNMDS) analysis of the functional groups dataset. Environmental (climatic and edaphic) and tree family abundance with significant correlation with the ordination axes are displayed. Abbreviations: MAP: mean annual precipitation, MDRT: mean diurnal range of temperature, PS: precipitation seasonality.

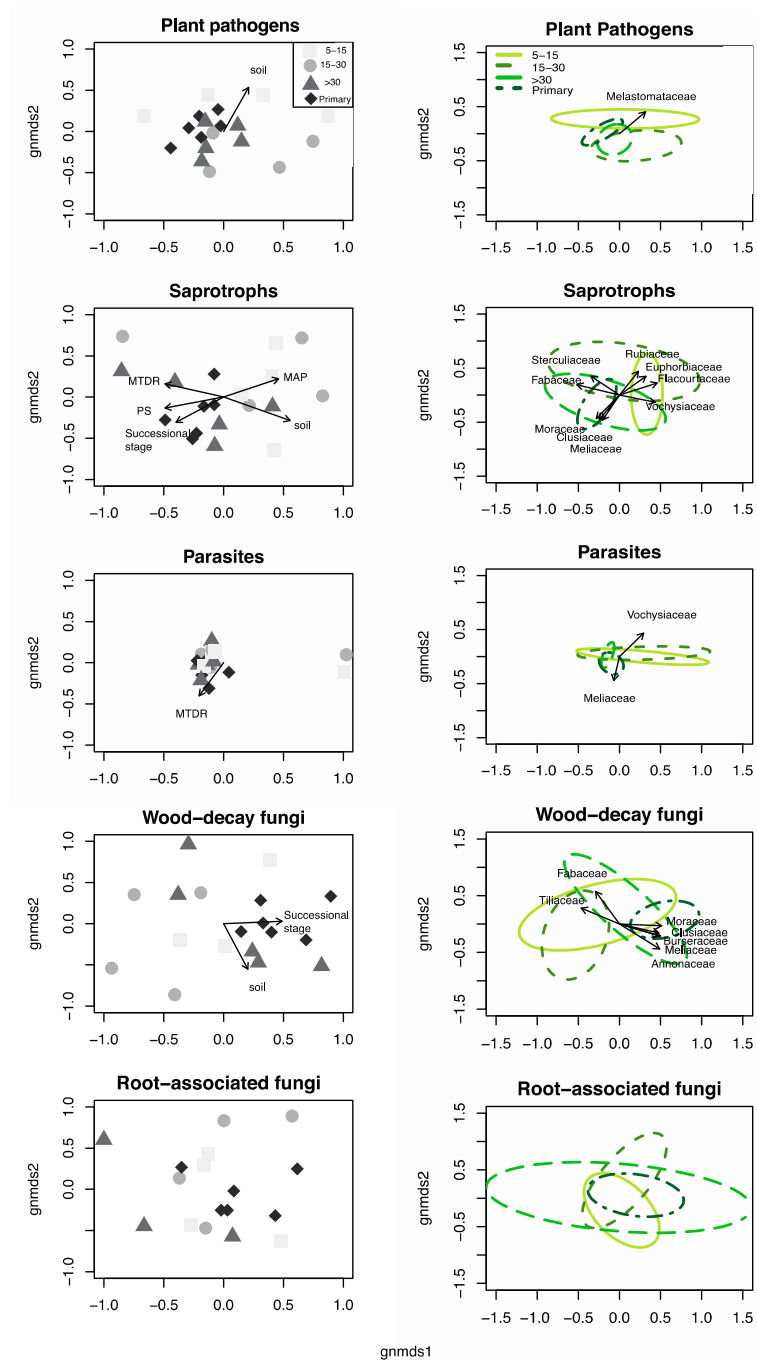

**Table S1.** Plot number, site information, forest stand age and geographic coordinates of the 19 permanent forest plots sampled for fungal community analyses.

| Sample | Plot | Site                    | Stand age | Latitude | Longitude  |
|--------|------|-------------------------|-----------|----------|------------|
| CR 1   | 1    | Piro - La U             | 15-30     | 8.414521 | -83.349166 |
| CR 2   | 2    | Piro – Laguna silvestre | Primary   | 8.411087 | -83.339610 |
| CR 3   | 3    | Piro – Osa Friends      | Primary   | 8.408313 | -83.335120 |
| CR 4   | 4    | Piro – Los higuerones   | 30<       | 8.406355 | -83.337594 |
| CR 5   | 5    | Piro - Terciopelo       | 15-30     | 8.402265 | -83.341205 |
| CR 6   | 6    | Piro - Río              | 30<       | 8.400080 | -83.337995 |
| CR 7   | 7    | Piro -BK                | 5-15      | 8.396825 | -83.306056 |
| CR 8   | 8    | Piro – Manuel Ramírez   | Primary   | 8.403934 | -83.307442 |
| CR 9   | 9    | Piro - Lapa Ríos        | 15-30     | 8.391543 | -83.295043 |
| CR 10  | 10   | Mogos – Bahia Chal      | Primary   | 8.761829 | -83.467603 |
| CR 11  | 11   | Mogos - Iglesia         | 30<       | 8.764016 | -83.366803 |
| CR 13  | 13   | Mogos - Primario        | Primary   | 8.754686 | -83.373081 |
| CR 14  | 14   | Mogos Helechal          | 5-15      | 8.754464 | -83.366760 |
| CR 15  | 15   | Piro - Terciopelo       | 30<       | 8.401407 | -83.342033 |
| CR 16  | 16   | Piro – Manuel Ramírez   | 30<       | 8.393010 | -83.322035 |
| CR 17  | 17   | Mogos - Pavona          | 5-15      | 8.782129 | -83.415306 |
| CR 18  | 18   | Mogos - Pavona          | 15-30     | 8.785882 | -83.421489 |
| CR 19  | 19   | Mogos                   | Primary   | 8.755942 | -83.370466 |
| CR 20  | 20   | Mogos                   | 5-15      | 8.783701 | -83.420093 |

**Table S2.** Fungal OTUs considered as significant indicators of the successional stages of regenerating tropical forest, with corresponding *p*-values, assigned functional guild, matching Species Hypothesis, ITS2 rDNA sequence similarity (%) and taxonomic classification of the most similar matching sequence in the UNITE+INSD dynamic Species Hypotheses database (version released on October 10, 2017).

| <i>OTU ID</i>   | <i>Forest Type</i> | <i>p Value</i> | <i>Accession</i> | <i>%</i> | <i>bp</i> |               | <i>Order</i>          | <i>Phylum</i>     |
|-----------------|--------------------|----------------|------------------|----------|-----------|---------------|-----------------------|-------------------|
| <i>OTU 2088</i> | 5-15               | 0.014          | AM260868         | 96       | 200       | SH474962.07FU | Mortierellales        | Mortierellomycota |
| <i>OTU 1905</i> | 15-30              | 0.015          | UDB020569        | 73.1     | 182       | SH026232.07FU | Coniochaetales        | Ascomycota        |
| <i>OTU 350</i>  | 15-30              | 0.016          | EU686753         | 75.9     | 203       | SH030917.07FU | Sordariales           | Ascomycota        |
| <i>OTU 23</i>   | 15-30              | 0.048          | JN890293         | 80.5     | 200       | SH468137.07FU | Sordariales           | Ascomycota        |
| <i>OTU 631</i>  | 15-30              | 0.018          | KP013012         | 97.5     | 200       | SH190270.07FU | Agaricales            | Basidiomycota     |
| <i>OTU 603</i>  | <30                | 0.018          | KX347480         | 91.5     | 200       | SH174595.07FU | unknown               | unknown           |
| <i>OTU 246</i>  | Primary            | 0.009          | GU187992         | 99       | 193       | SH480688.07FU | Botryosphaerales      | Ascomycota        |
| <i>OTU 334</i>  | Primary            | 0.01           | KU314949         | 96.3     | 190       | SH524979.07FU | Pleosporales          | Ascomycota        |
| <i>OTU 150</i>  | Primary            | 0.013          | KU534808         | 100      | 200       | SH630161.07FU | unknown               | 0                 |
| <i>OTU 926</i>  | Primary            | 0.031          | FJ612616         | 93.7     | 189       | SH211130.07FU | unknown               | Ascomycota        |
| <i>OTU 1020</i> | Primary            | 0.043          | EF423546         | 97.5     | 200       | SH217133.07FU | Xylariales            | Ascomycota        |
| <i>OTU 1378</i> | Primary            | 0.046          | KM374325         | 74.6     | 201       | SH495740.07FU | unknown               | Ascomycota        |
| <i>OTU 922</i>  | Primary            | 0.048          | KP235767         | 88.1     | 201       | SH521485.07FU | Venturiales           | Ascomycota        |
| <i>OTU 847</i>  | Primary            | 0.035          | FN812805         | 89.7     | 203       | SH211372.07FU | unknown               | Ascomycota        |
| <i>OTU 2634</i> | Primary            | 0.04           | AF502896         | 93.8     | 194       | SH200172.07FU | Xylariales            | Ascomycota        |
| <i>OTU 1377</i> | Primary            | 0.042          | FJ612763         | 97       | 202       | SH195305.07FU | Sordariales           | Ascomycota        |
| <i>OTU 1198</i> | Primary            | 0.046          | KT328673         | 95.7     | 186       | SH492885.07FU | Pleosporales          | Ascomycota        |
| <i>OTU 1498</i> | Primary            | 0.047          | KM265826         | 99.4     | 170       | SH182681.07FU | Hypocreales           | Ascomycota        |
| <i>OTU 1227</i> | Primary            | 0.042          | KF435425         | 70.5     | 200       | SH181517.07FU | unknown               | Ascomycota        |
| <i>OTU 1224</i> | Primary            | 0.043          | JQ838232         | 100      | 200       | SH213908.07FU | Xylonomycetales       | Ascomycota        |
| <i>OTU 1380</i> | Primary            | 0.048          | HM239729         | 88.1     | 201       | SH181605.07FU | Archaeorhizomycetales | Ascomycota        |
